# Supplementary material for: Heterogeneity of mammary lesions represent molecular differences
Source: BMC Cancer. 2006 Dec 5;6:275. doi: 10.1186/1471-2407-6-275 (PMC1762020; doi:10.1186/1471-2407-6-275)
Supplement: Additional File 5 — Expression differences of ER and aromatase between ovarian hormone sensitive and less sensitive MIN-Os. ERalpha, ERbeta, and aromatase expression differences were compared between estrogen sensitive (8w-B&8w-D) and less sensitive (4w-4&4w-11) MIN-O lines. [file 1471-2407-6-275-S5.xls]

## Sheet: Sheet1
Supplemental table 5: Expression differences of ER and aromatase between ovarian hormone sensitive and less sensitive MIN-Os.
		probe ID	p-value	FC*
	ESR1 (ERalpha)
		161113_at	0.0091	1.10573
		93945_at	0.0351	1.04899
		93946_at	0.2366	1.02669
		93947_g_at	0.3503	1.06142
	ESR2 (ERbeta)
		96514_at	0.0111	1.06659
	Cyp19a1 (aromatase)
		101200_at	0.0068	1.06585
	* Calculated by 4w-4 & 4w-11 vs. 8w-B & 8w-D
